# Supplementary material
Source: Springer Nature journal article supplement (https://www.springermedizin.de/resource/supplementary/12943_2014_1385_MOESM3_ESM.pdf/9552860)

Figure S3

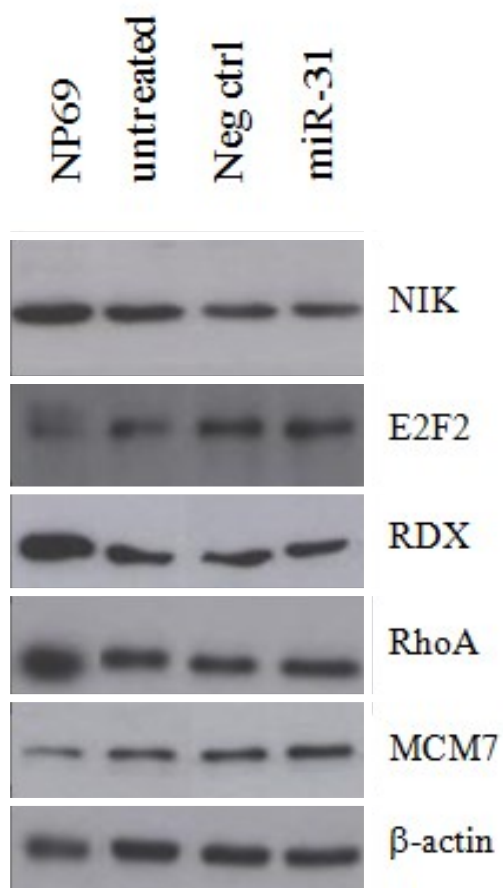

Supplement: MOESM3 [file 9552860]
